# Supplementary material for: Phenotypic and Genotypic Virulence Characterisation of Staphylococcus pettenkoferi Strains Isolated from Human Bloodstream and Diabetic Foot Infections
Source: Int J Mol Sci. 2022 Dec 7;23(24):15476. doi: 10.3390/ijms232415476 (PMC9778964; doi:10.3390/ijms232415476)
Supplement: Supplementary file 1 [file ijms-23-15476-s001.zip › ijms-2021840-supplementary.xlsx]

## Sheet: Supplementary Table S1
Table S1. Summary of the Whole Genome Sequencing bio-informatic analysis.
Feature	Genome size (bp)	Contigs number	G+C content (%)	Number CDS	N50	Coverage (x)	GenBank Accession Number
NSP003P	2,514,936	20	38.78	2.252	291.462	143	SAMN30360625
NSP004P	2,500,112	32	38.70	2.247	513.563	91	SAMN30360626
NSP007P	2,455,524	61	38.70	2.234	119.942	124	SAMN30360627
NSP008P	2,490,351	37	38.68	2.248	130.771	107	SAMN30360628
NSP009P	2,509,387	45	38.67	2.272	155.939	138	SAMN30360629
NSP010P	2,492,057	29	38.64	2.275	197.851	163	SAMN30360630
NSP011P	2,437,344	37	38.68	2.258	164.432	102	SAMN30360631
NSP012P	2,609,858	72	38.55	2.432	107.694	200	SAMN30360632
NSP013P	2,456,877	63	38.69	2.236	119.942	122	SAMN30360633
NSP015P	2,452,556	62	38.69	2.233	119.942	193	SAMN30360634
NSP016P	2,506,447	31	38.63	2.286	225.977	262	SAMN30360635
NSP017P	2,484,961	29	38.75	2.274	184,110	101	SAMN30360636
NSP018P	2,447,301	46	38.74	2.203	149.399	201	SAMN30360637
NSP019P	2,456,816	26	38.91	2.224	224,160	137	SAMN30360638
NSP020P	2,552,985	56	38.55	2.291	102.977	147	SAMN30360639
NSP021P	2,475,914	23	38.86	2.246	580.478	112	SAMN30360640
NSP022P	2,504,310	28	38.64	2.282	225.974	127	SAMN30360641
NSP023P	2,540,746	60	38.55	2.348	108.349	125	SAMN30360642
NSP024P	2,481,589	38	38.70	2.253	160.658	162	SAMN30360643
NSP025P	2,506,261	64	38.60	2.223	97.432	91	SAMN30360644
NSP026P	2,545,426	49	38.72	2.355	139.923	104	SAMN30360645
NSP001H	2,515,043	23	38.62	2,260	453.324	173	SAMN30360646
NSP002H	2,418,373	21	38.97	2.167	583.086	130	SAMN30360647
NSP003H	2,421,274	34	38.88	2.171	184.519	134	SAMN30360648
NSP004H	2,512,353	50	38.66	2.308	106.545	136	SAMN30360649
NSP005H	2,423,244	33	38.87	2.178	184.519	178	SAMN30360650
NSP007H	2,467,147	25	38.89	2.234	582.723	217	SAMN30360652
NSP008H	2,527,698	23	38.74	2.267	234.815	172	SAMN30360653
CCUG51270	2,455,260	123	38.50	2.319	62,580	47	NZ_PPRN00000000
589_SHAE	2,456,686	41	39.00	2.243	126.285	28	NZ_JVAY00000000
1286_SHAE	2,503,503	72	38.50	2.342	69.216	13	NZ_JVVL00000000
FDAARGOS_288	2,502,360	ND	38.85	2,380	ND	1373	NZ_CP022096
1H7	2,444,776	48	38.50	2.307	116.463	486	NZ_JAGSWR000000000
SP165	2,435,720	54	38.91	2.298	69.341	54	NZ_CP085279
ND, not determined; CDS, coding DNA sequences.

## Sheet: Supplementary Table S2
Table S2. Resistome traits of S. pettenkoferi strains
	Resistance associated genes (Presence = 1 ; Absence = 0)
	blaZ	vgaA	fusB	mgrA	ant(9)-Ia	ermA	mecA	grlA (p.S80Y )	grlB (E422D)	gyrA (p.S84L)	tetK	rpoB (p.H481N)	fosB
SP165	0	0	0	1	1	1	1	1	0	1	0	1	1
NSP003P	0	0	0	1	0	0	0	0	0	0	0	0	0
NSP004P	0	1	1	1	0	0	0	0	0	1	0	0	1
NSP007P	1	0	1	1	0	0	0	1	1	0	0	0	0
NSP008P	0	0	0	1	0	0	0	1	0	0	0	0	1
NSP009P	1	0	0	1	1	1	0	1	0	1	1	0	1
NSP010P	0	0	0	1	0	0	0	1	1	0	0	0	0
NSP011P	0	0	0	1	0	0	0	0	1	0	0	0	0
NSP012P	1	0	1	1	0	0	0	1	1	1	0	0	0
NSP013P	1	0	1	1	0	0	0	1	1	0	0	0	0
NSP015P	1	0	1	1	0	0	0	1	1	0	0	0	0
NSP016P	0	0	1	1	0	0	0	1	1	0	0	0	0
NSP017P	0	0	0	1	0	0	0	0	1	0	0	0	0
NSP018P	0	0	0	1	0	0	0	1	1	0	0	0	0
NSP019P	0	1	0	1	0	0	0	1	0	0	0	0	1
NSP020P	0	0	0	1	0	0	0	1	0	0	0	0	1
NSP021P	1	0	0	1	0	0	0	1	0	0	0	0	0
NSP022P	0	0	1	1	0	0	0	1	1	0	0	0	0
NSP023P	1	0	0	1	0	0	0	1	1	0	0	0	0
NSP024P	1	0	0	1	0	0	0	1	1	0	0	0	0
NSP025P	0	1	0	1	1	1	0	1	0	1	0	0	0
NSP026P	1	0	0	1	0	0	0	0	1	0	0	0	0
NSP001H	1	1	1	1	0	0	0	0	0	1	0	0	0
NSP002H	0	0	0	1	0	0	0	1	0	0	0	0	1
NSP003H	0	1	0	1	0	0	0	1	0	0	0	0	1
NSP004H	1	0	0	1	0	0	0	1	1	0	0	0	0
NSP005H	0	1	0	1	0	0	0	1	0	0	0	0	1
NSP007H	1	0	0	1	0	0	0	1	0	0	0	0	0
NSP008H	0	0	0	1	0	0	0	1	0	0	0	0	1

## Sheet: Supplementary Table S3
Table S4. Plasmid research in S. pettenkoferi genomes
	Plasmid	Identity (%)	Query / Template length	Contig	Note	Accession number
SP165	/
NSP003P	rep24c	98.49	993 / 993	contig_17_1	rep(pSSAP1)	FR687301
NSP004P	rep24c	98.49	993 / 993	contig_12_1	rep(pSSAP1)	FR687301
NSP007P	rep24c	97.89	993 / 993	contig_36_1	rep(pSSAP1)	FR687301
NSP008P	rep24c	98.39	993 / 993	contig_33_1	rep(pSSAP1)	FR687301
NSP009P	rep7a	99.83	592 / 750	contig_28_1	repC(pS0385p1)	AM990993
	rep5d	97.01	636 / 636	contig_25_1	rep(pJE1)	AF051916
	rep24c	98.09	993 / 993	contig_17_1	rep(pSSAP1)	FR687301
NSP010P	rep24c	98.49	993 / 993	contig_22_1	rep(pSSAP1)	FR687301
NSP011P	rep21	96.3	891 / 950	contig_24_1	repRC(pSK41)	AF051917
	rep5d	97.01	636 / 636	contig_17_1	rep(pJE1)	AF051916
NSP012P	/
NSP013P	rep24c	97.89	993 / 993	contig_51_1	rep(pSSAP1)	FR687301
NSP015P	rep24c	97.89	993 / 993	contig_40_1	rep(pSSAP1)	FR687301
NSP016P	rep21	96.3	891 / 950	contig_28_1	repRC(pSK41)	AF051917
NSP017P	/
NSP018P	rep5b	96.73	857 / 858	contig_4_1	SAP108B006(SAP108B)	GQ900459
NSP019P	rep24c	98.49	993 / 993	contig_8_1	rep(pSSAP1)	FR687301
NSP020P	rep5b	100	858 / 858	contig_6_1	SAP108B006(SAP108B)	GQ900459
	rep10	100	477 / 477	contig_19_1	rep(SAP093B)	GQ900442
NSP021P	/
NSP022P	rep5b	100	858 / 858	contig_4_1	SAP108B006(SAP108B)	GQ900459
	rep5d	97.17	636 / 636	contig_9_1	rep(pJE1)	AF051916
	rep21	96.3	891 / 950	contig_28_1	repRC(pSK41)	AF051917
NSP023P	/
NSP024P	rep21	96.3	891 / 950	contig_36_1	repRC(pSK41)	AF051917
	rep5b	99.88	858 / 858	contig_13_1	SAP108B006(SAP108B)	GQ900459
NSP025P	rep24c	98.49	993 / 993	contig_62_1	rep(pSSAP1)	FR687301
NSP026P	rep21	96.3	891 / 950	contig_21_1	repRC(pSK41)	AF051917
NSP001H	rep24c	98.49	993 / 993	contig_16_2	rep(pSSAP1)	FR687301
NSP002H	/
NSP003H	rep24c	98.49	993 / 993	contig_1_2	rep(pSSAP1)	FR687301
NSP004H	rep21	96.3	891 / 950	contig_43_1	repRC(pSK41)	AF051917
NSP005H	rep24c	98.49	993 / 993	contig_30_1	rep(pSSAP1)	FR687301
NSP007H	/
NSP008H	rep24c	98.49	993 / 993	contig_8_3	rep(pSSAP1)	FR687301

## Sheet: Supplementary Table S4
Table S5. Growth profiles of S. pettenkoferi NSP003P, NSP009P, NSP023P, NSPH004H and S.aureus Newman
		Ym	Y0	K(h-1)	1/K (h)	Y = ax + b (R2)
	NSP003P	1.234 (1.215 ; 1.253)	0.030 (0.016 ; 0.048)	0.237 (0.214 ; 0.263)	4.227 (3.807 ; 4.668)	y = 0.120x + 0.213 (1)
	NSP009P	1.062 (1.029 ; 1.098)	0.026 (0.005 ; 0.060)	0.217 (0.118 ; 0.272)	4.609 (3.671 ; 5.635)	y = 0.118x - 0.362 (1)
	NSP023P	1.086 (1.066 ; 1.106)	0.044 (0.022 ; 0.070)	0.246 (0.215 ; 0.284)	4.066 (3.520 ; 4.648)	y = 0.125x - 0.214 (1)
	NSP004H	0.953 (0.925 ; 0.986)	0.013 (0.002 ; 0.032)	0.189 (0.158 ; 0.231)	5.290 (4.328 ; 6.319)	y = 0.067x - 0.212 (1)
	S.aureus Newman	1.644 (1.607 ; 1.682)	0.129 (0.105 ; 0.155)	0.194 (0.179 ; 0.211)	5.147 (4.739 ; 5.591)	y = 0.154x - 0.102 (1)
Ym (maximum absorbance), Y0 (initial absorbance), K (lag time, h-1), 1/K (inflection point, h), and the extrapolated linear equation of the exponential phase

## Sheet: Supplementary Table S5
Table S5. Genomic Analysis of Biofilm associated genes in S. pettenkoferi strains
Genes	bhp	atlE	sesC, sasC, sasG	embp	fnbpA, fnbpB	fib, fbl	clfA, clfB	sdrC, sdrE, sdrG, sdrF, sdrH	/	cna	ebps	icaA	icaB	icaC	icaD	isdA, isdB	aap	sbp	splA, splB,splC, splD,splE	splF	clpP	SSP1763	HMPREF2802_03390	icaR	agr A	agr C	agr B	agr D	sigB	rsbU	rsbV	rsbW	lytSR	arlSR	mgrA	cidA	lgrA	sarA	luxS	BUY34_08050
Proteins	Biofilm associated protein	Autolysin E	Surface proteins	Extracellular matrix binding protein Embp	Fibronectin binding protein A and B	Fibrinogen-binding protein	clumping factor A and B	Serine-aspartate repeat-containing protein C,E,G,F,H	B-like domain from the SdrD protein	Collagen adhesin	Elastin-binding protein EbpS	poly-beta-1,6 N-acetyl-D-glucosamine synthase	Biofilm polysaccharide intercellular adhesin deacetylase	polysaccharide intercellular adhesin biosynthesis/export protein	Poly-beta-1,6-N-acetyl-D-glucosamine synthesis protein IcaD	Iron-regulated surface determinant protein A and B	Accumulation associated protein	S.epidermidis biofilm accumulation	Serine proteases SplA, splB,splC,splD,splE	Serine protease SplF	ClpP protease	Serine protease HtrA-like	Serine protease	Biofilm operon icaADBC HTH-type negative transcriptional regulator IcaR	Accessory gene regulator	Accessory gene regulator CA0A658S0A9	Accessory gene regulator	Accessory gene regulator	Sigma B	Serine phosphatase RsbU, regulator of sigma subunit	Anti-sigma-B factor antagonist	Serine-protein kinase RsbW	lytSR	ArlRS two-component system	HTH-type transcriptional regulator MgrA	Holin-like protein CidA	Antiholin-like protein LrgA	Transcriptional regulator SarA	S-ribosylhomocysteine lyase	Hemolysin H3C = Phenol soluble modulin beta protein
SP165	0	1	0	0	0	0	0	0	0	0	0	1	1	1	0	0	0	0	0	1	1	1	1	0	1	1	0	0	1	1	1	1	1	1	1	0	1	1	1	1
NSP003P	0	1	0	0	0	0	0	0	1	0	0	1	1	1	0	0	0	0	0	1	1	1	1	0	1	1	0	0	1	1	1	1	1	1	1	0	1	1	1	1
NSP004P	0	1	0	0	0	0	0	0	1	0	0	1	1	1	0	0	0	0	0	1	1	1	1	0	1	1	0	0	1	1	1	1	1	1	1	1	1	1	1	1
NSP007P	0	1	0	0	0	0	0	0	0	0	0	1	1	1	0	0	0	0	0	1	1	1	1	0	1	1	0	0	1	1	1	1	1	1	1	1	1	1	1	1
NSP008P	0	1	0	0	0	0	0	0	0	0	0	1	1	1	0	0	0	0	0	1	1	1	1	0	1	1	0	0	1	1	1	1	1	1	1	1	1	1	1	1
NSP009P	0	1	0	0	0	0	0	0	0	0	0	1	1	1	0	0	0	0	0	1	1	1	1	0	1	1	0	0	1	1	1	1	1	1	1	1	1	1	1	1
NSP010P	0	1	0	0	0	0	0	0	0	0	0	1	1	1	0	0	0	0	0	1	1	1	1	0	1	1	0	0	1	1	1	1	1	1	1	0	1	1	1	1
NSP011P	0	1	0	0	0	0	0	0	0	0	0	1	1	1	0	0	0	0	0	1	1	1	1	0	1	1	0	0	1	1	1	1	1	1	1	1	1	1	1	1
NSP012P	1	1	0	0	0	0	0	0	0	0	0	1	1	1	0	0	0	0	0	1	1	1	1	0	1	1	0	0	1	1	1	1	1	1	1	1	1	1	1	1
NSP013P	0	1	0	0	0	0	0	0	0	0	0	1	1	1	0	0	0	0	0	1	1	1	1	0	1	1	0	0	1	1	1	1	1	1	1	1	1	1	1	1
NSP015P	0	1	0	0	0	0	0	0	0	0	0	1	1	1	0	0	0	0	0	1	1	1	1	0	1	1	0	0	1	1	1	1	1	1	1	1	1	1	1	1
NSP016P	0	1	0	0	0	0	0	0	0	0	0	1	1	1	0	0	0	0	0	1	1	1	1	0	1	1	0	0	1	1	1	1	1	1	1	1	1	1	1	1
NSP017P	0	1	0	0	0	0	0	0	0	0	0	1	1	1	0	0	0	0	0	1	1	1	1	0	1	1	0	0	1	1	1	1	1	1	1	1	1	1	1	1
NSP018P	0	1	0	0	0	0	0	0	0	0	0	1	1	1	0	0	0	0	0	1	1	1	1	0	1	1	0	0	1	1	1	1	1	1	1	0	1	1	1	1
NSP019P	0	1	0	0	0	0	0	0	0	0	0	1	1	1	0	0	0	0	0	1	1	1	1	0	1	1	0	0	1	1	1	1	1	1	1	1	1	1	1	1
NSP020P	0	1	0	0	0	0	0	0	1	0	0	1	1	1	0	0	0	0	0	1	1	1	1	0	1	1	0	0	1	1	1	1	1	1	1	1	1	1	1	1
NSP021P	0	1	0	0	0	0	0	0	1	0	0	1	1	1	0	0	0	0	0	1	1	1	1	0	1	1	0	0	1	1	1	1	1	1	1	1	1	1	1	1
NSP022P	0	1	0	0	0	0	0	0	0	0	0	1	1	1	0	0	0	0	0	1	1	1	1	0	1	1	0	0	1	1	1	1	1	1	1	1	1	1	1	1
NSP023P	1	1	0	0	0	0	0	0	0	0	0	1	1	1	0	0	0	0	0	1	1	1	1	0	1	1	0	0	1	1	1	1	1	1	1	1	1	1	1	1
NSP024P	0	1	0	0	0	0	0	0	0	0	0	1	1	1	0	0	0	0	0	1	1	1	1	0	1	1	0	0	1	1	1	1	1	1	1	1	1	1	1	1
NSP025P	0	1	0	0	0	0	0	0	1	0	0	1	1	1	0	0	0	0	0	1	1	1	1	0	0	1	0	0	1	1	1	1	1	1	1	0	1	1	1	1
NSP026P	0	1	0	0	0	0	0	0	0	0	0	1	1	1	0	0	0	0	0	1	1	1	1	0	1	1	0	0	1	1	1	1	1	1	1	1	1	1	1	1
NSP001H	0	1	0	0	0	0	0	0	1	0	0	1	1	1	0	0	0	0	0	1	1	1	1	0	1	1	0	0	1	1	1	1	1	1	1	1	1	1	1	1
NSP002H	0	1	0	0	0	0	0	0	1	0	0	1	1	1	0	0	0	0	0	1	1	1	1	0	1	1	0	0	1	1	1	1	1	1	1	1	1	1	1	1
NSP003H	0	1	0	0	0	0	0	0	0	0	0	1	1	1	0	0	0	0	0	1	1	1	1	0	1	1	0	0	1	1	1	1	1	1	1	1	1	1	1	1
NSP004H	0	1	0	0	0	0	0	0	0	0	0	1	1	1	0	0	0	0	0	1	1	1	1	0	1	1	0	0	1	1	1	1	1	1	1	1	1	1	1	1
NSP005H	0	1	0	0	0	0	0	0	0	0	0	1	1	1	0	0	0	0	0	1	1	1	1	0	1	1	0	0	1	1	1	1	1	1	1	1	1	1	1	1
NSP007H	0	1	0	0	0	0	0	0	1	0	0	1	1	1	0	0	0	0	0	1	1	1	1	0	1	1	0	0	1	1	1	1	1	1	1	1	1	1	1	1
NSP008H	0	1	0	0	0	0	0	0	1	0	0	1	1	1	0	0	0	0	0	1	1	1	1	0	1	1	0	0	1	1	1	1	1	1	1	0	1	1	1	1
CIP 107711	0	1	0	0	0	0	0	0	0	0	0	1	1	1	0	0	0	0	0	1	1	1	1	0	1	1	0	0	1	1	1	1	1	1	1	1	1	1	1	1

## Sheet: Supplementary Table S6
Table S6. Staphylococcus pettenkoferi whole-genome-based analysis to determine putative virulence determinants.
Proteins	Hemolysin III	δ-hemolysin	Hemolysin H1U	α-, β-, ɣ- hemolysins	Enterotoxins	Toxic shock syndrome toxin-1	Exfoliatin	Leukotoxin	Capsule biosynthesis protein CapA	Enolase	Catalase	esXA : Type VII secretion system (T7SS) substrate	EsaA	EsaB	EssA	EssB	EssC	Elongation factor tu	Lipoprotein signal peptidase	Lipoprotein diacylglycerol transferase	Coagulase	Staphylokinase	von Willebrand factor binding protein Vwb	Clp proteases				Adaptater protein MecA	Zinc metalloproteinase aureolysin	DNA-binding response regulator	Sensor histidine kinase	Transcriptional regulatory protein SrrA	Sensor protein SrrB	Sensor Ptreotein VraS	Response regulator protein VraR	Histidine protein kinase SaeS	Response regulator SaeR	Virulence-associated protein E	Conserved virulence factor B	Conserved virulence factor C	Lipase = alpha/beta hydrolase	Iron-regulated surface determinant protein F	Thermonuclease H
Genes	yqfA	hld	ERS010499_02103	hly, hlb, hlg	sea, sel, seg, sed	tsst-1	etA, etB, etD	lukDE	CapA	eno	katA	/	T7SSb apparatus encoding genes					tuf	lspA	lgt	coA	spA	vwb	clpC	clpX	clpP	clpXP	mecA	aur	nsaR	nsaS	srrA	srrB	vraS	vraR	saeS	saeR	virE	cvfB	cvfC	CJ235_09000	isdF	nucH
SP165	1	0	0	0	0	0	0	0	1	1	1	0	0	0	0	0	0	1	1	1	0	0	0	1	1	1	1	1	0	0	1	0	1	0	1	1	1	0	1	1	1	1	1
NSP003P	1	1	1	0	0	0	0	0	1	1	1	1	0	0	0	0	0	1	1	1	0	0	0	1	1	1	1	1	0	0	1	0	1	0	1	1	1	0	1	1	1	1	1
NSP004P	1	1	1	0	0	0	0	0	1	1	1	1	1	1	1	1	1	1	1	1	0	0	0	1	1	1	1	1	0	0	1	0	1	0	1	1	1	0	1	1	1	1	1
NSP007P	1	1	1	0	0	0	0	0	1	1	1	0	0	0	0	0	0	1	1	1	0	0	0	1	1	1	1	1	0	0	1	0	1	0	1	1	1	0	1	1	1	1	1
NSP008P	1	0	1	0	0	0	0	0	1	1	1	0	0	0	0	0	0	1	1	1	0	0	0	1	1	1	1	1	0	0	1	0	1	0	1	1	1	1	1	1	1	1	1
NSP009P	1	0	1	0	0	0	0	0	1	1	1	0	0	0	0	0	0	1	1	1	0	0	0	1	1	1	1	1	0	0	1	0	1	0	1	1	1	0	1	1	1	1	1
NSP010P	1	1	0	0	0	0	0	0	1	1	1	0	0	0	0	0	0	1	1	1	0	0	0	1	1	1	1	1	0	0	1	0	1	0	1	1	1	0	1	1	1	1	1
NSP011P	1	1	0	0	0	0	0	0	1	1	1	0	0	0	0	0	0	1	1	1	0	0	0	1	1	1	1	1	0	0	1	0	1	0	1	1	1	0	1	1	1	1	1
NSP012P	1	1	0	0	0	0	0	0	1	1	1	0	0	0	0	0	0	1	1	1	0	0	0	1	1	1	1	1	0	0	1	0	1	0	1	1	1	0	1	1	1	1	1
NSP013P	1	1	1	0	0	0	0	0	1	1	1	0	0	0	0	0	0	1	1	1	0	0	0	1	1	1	1	1	0	0	1	0	1	0	1	1	1	0	1	1	1	1	1
NSP015P	1	1	1	0	0	0	0	0	1	1	1	0	0	0	0	0	0	1	1	1	0	0	0	1	1	1	1	1	0	0	1	0	1	0	1	1	1	0	1	1	1	1	1
NSP016P	1	1	0	0	0	0	0	0	1	1	1	0	0	0	0	0	0	1	1	1	0	0	0	1	1	1	1	1	0	0	1	0	1	0	1	1	1	0	1	1	1	1	1
NSP017P	1	1	0	0	0	0	0	0	1	1	1	0	0	0	0	0	0	1	1	1	0	0	0	1	1	1	1	1	0	0	1	0	1	0	1	1	1	0	1	1	1	1	1
NSP018P	1	1	0	0	0	0	0	0	1	1	1	0	0	0	0	0	0	1	1	1	0	0	0	1	1	1	1	1	0	0	1	0	1	0	1	1	1	0	1	1	1	1	1
NSP019P	1	0	1	0	0	0	0	0	1	1	1	0	0	0	0	0	0	1	1	1	0	0	0	1	1	1	1	1	0	0	1	0	1	0	1	1	1	0	1	1	1	1	1
NSP020P	1	1	0	0	0	0	0	0	1	1	1	1	0	0	0	0	0	1	1	1	0	0	0	1	1	1	1	1	0	0	1	0	1	0	1	1	1	0	1	1	1	1	1
NSP021P	1	1	1	0	0	0	0	0	1	1	1	0	0	0	0	0	0	1	1	1	0	0	0	1	1	1	1	1	0	0	1	0	1	0	1	1	1	0	1	1	1	1	1
NSP022P	1	1	0	0	0	0	0	0	1	1	1	0	0	0	0	0	0	1	1	1	0	0	0	1	1	1	1	1	0	0	1	0	1	0	1	1	1	0	1	1	1	1	1
NSP023P	1	1	0	0	0	0	0	0	1	1	1	0	0	0	0	0	0	1	1	1	0	0	0	1	1	1	1	1	0	0	1	0	1	0	1	1	1	1	1	1	1	1	1
NSP024P	1	1	0	0	0	0	0	0	1	1	1	0	0	0	0	0	0	1	1	1	0	0	0	1	1	1	1	1	0	0	1	0	1	0	1	1	1	0	1	1	1	1	1
NSP025P	1	1	0	0	0	0	0	0	1	1	1	1	0	0	0	0	0	1	1	1	0	0	0	1	1	1	1	1	0	0	1	0	1	0	1	1	1	0	1	1	1	1	1
NSP026P	1	1	0	0	0	0	0	0	1	1	1	0	0	0	0	0	0	1	1	1	0	0	0	1	1	1	1	1	0	0	1	0	1	0	1	1	1	0	1	1	1	1	1
NSP001H	1	1	1	0	0	0	0	0	1	1	1	1	1	1	1	1	1	1	1	1	0	0	0	1	1	1	1	1	0	0	1	0	1	0	1	1	1	0	1	1	1	1	1
NSP002H	1	1	1	0	0	0	0	0	1	1	1	0	0	0	0	0	0	1	1	1	0	0	0	1	1	1	1	1	0	0	1	0	0	0	1	1	1	0	1	1	1	1	1
NSP003H	1	0	1	0	0	0	0	0	1	1	1	0	0	0	0	0	0	1	1	1	0	0	0	1	1	1	1	1	0	0	1	0	1	0	1	1	1	0	1	1	1	1	1
NSP004H	1	1	0	0	0	0	0	0	1	1	1	0	0	0	0	0	0	1	1	1	0	0	0	1	1	1	1	1	0	0	1	0	1	0	1	1	1	0	1	1	1	1	1
NSP005H	1	0	1	0	0	0	0	0	1	1	1	0	0	0	0	0	0	1	1	1	0	0	0	1	1	1	1	1	0	0	1	0	1	0	1	1	1	0	1	1	1	1	1
NSP007H	1	1	1	0	0	0	0	0	1	1	1	0	0	0	0	0	0	1	1	1	0	0	0	1	1	1	1	1	0	0	1	0	1	0	1	1	1	0	1	1	1	1	1
NSP008H	1	1	1	0	0	0	0	0	1	1	1	1	0	0	0	0	0	1	1	1	0	0	0	1	1	1	1	1	0	0	1	0	1	0	1	1	1	0	1	1	1	1	1
CIP 107711	1	0	1	0	0	0	0	0	1	1	1	1	0	0	0	0	0	1	1	1	0	0	0	1	1	1	1	1	0	0	1	0	1	0	1	1	1	0	1	1	1	1	1
